# Supplementary material for: Pulsatilla Saponins Inhibit Experimental Lung Metastasis of Melanoma via Targeting STAT6-Mediated M2 Macrophages Polarization
Source: MDPI journal article supplement (doi:10.3390/molecules28093682), 2023-04-24
Supplement: s1 [file s1]

Article

# Pulsatilla saponins inhibit experimental lung metastasis of melanoma via targeting STAT6-mediated M2 macrophages polarization

Xin Yang<sup>1,†</sup>, Miaolin Wu<sup>1,†</sup>, Xin Yan<sup>2</sup>, Cheng Zhang<sup>3</sup>, Yingying Luo<sup>1,3,4,\*</sup>, Jun Yu<sup>3,\*</sup>

<sup>1</sup> Center for Translational Medicine, Jiangxi Key Laboratory of Traditional Chinese Medicine in Prevention and Treatment of Vascular Remodeling Associated Disease, Jiangxi University of Chinese Medicine, Nanchang 330006, China

<sup>2</sup> The Second Affiliated Hospital, Jiangxi University of Chinese Medicine, Nanchang 330006, China

<sup>3</sup> Department of Cardiovascular Sciences and Center for Metabolic Disease Research, Lewis Katz School of Medicine, Temple University, Philadelphia, PA 19140, USA

<sup>4</sup> State Key Laboratory of Innovative Drug and Efficient Energy-Saving Pharmaceutical Equipment, No. 56 Yangming Road, Nanchang 330006, PR China

\* Correspondence: luoying0302@163.com (Y.L.); jun.yu@temple.edu (J.Y.); Tel.: +86-791-87119615 (Y.L.)

† These authors contributed equally to this work.

**Citation:** To be added by editorial staff during production.

Academic Editor: Firstname Last-name

Received: date

Revised: date

Accepted: date

Published: date

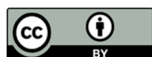

**Copyright:** © 2023 by the authors.

Submitted for possible open access publication under the terms and conditions of the Creative Commons Attribution (CC BY) license (<https://creativecommons.org/licenses/by/4.0/>).

## Supplementary Figure S1

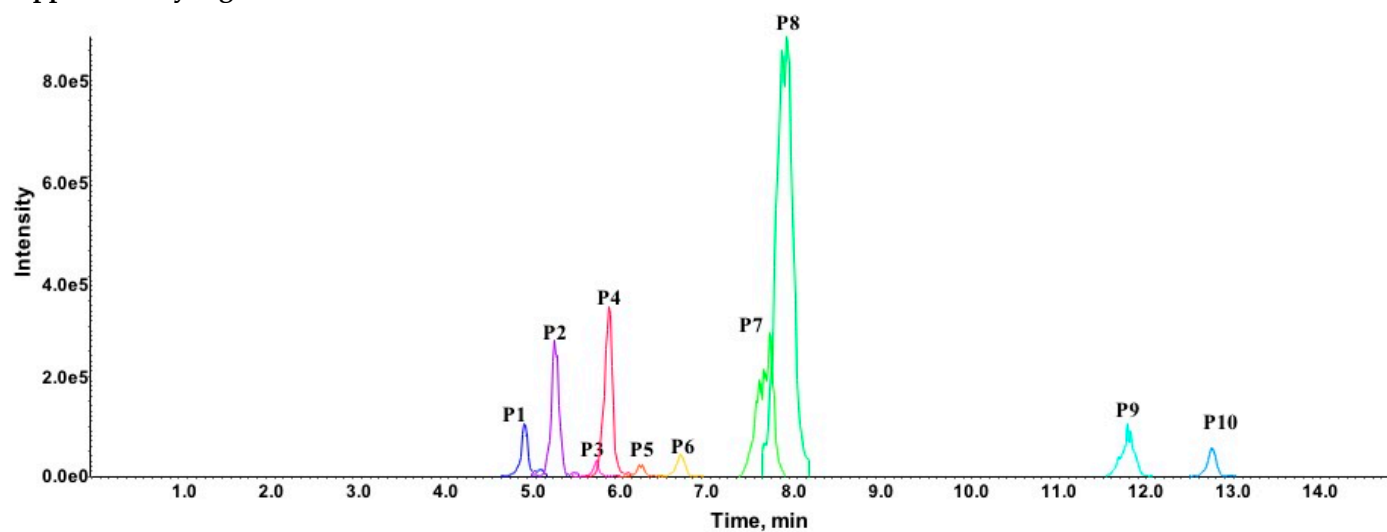

**Figure S1.** PS extraction ion chromatogram obtained by UPLC-Q-TOF-MS/MS.

## Supplementary Table S1.

Table S1. Constituents Identification of *Pulsatilla Saponins* obtained by UPLC-Q-TOF-MS/MS

| NO. | tR (min) | Formula   | Calculated [M-H]-m/z | Experimental [M-H]-m/z | Error (ppm) | (MS2) m/z                  | Relative areas $\times 10^5$ | Identification                                                                                                                                                                                     |
|-----|----------|-----------|----------------------|------------------------|-------------|----------------------------|------------------------------|----------------------------------------------------------------------------------------------------------------------------------------------------------------------------------------------------|
| P1  | 4.97     | C53H86O22 | 1073.5338            | 1073.56203             | 0.7         | 911.5133,603.3945          | 1.0                          | Hederacoside D                                                                                                                                                                                     |
| P2  | 5.32     | C47H76O17 | 911.50098            | 911.50761              | 0.3         | 749.4578,603.3956,471.3509 | 2.7                          | Pulsatilla saponin D                                                                                                                                                                               |
| P3  | 5.79     | C41H66O13 | 765.44307            | 765.44894              | 1.2         | 603.3945,471.3503          | 3.2                          | Hederagenin sapogenin 3-O- $\beta$ -D-glucopyranosyl-(1 $\rightarrow$ 4)- $\alpha$ -L-arabinose                                                                                                    |
| P4  | 5.93     | C47H76O17 | 911.50098            | 911.50812              | 0.9         | 749.4578,603.3956,471.3509 | 3.4                          | Hederagenin sapogenin 3-O- $\beta$ -D-glucopyranosyl-(1 $\rightarrow$ 3)- $\alpha$ -L-rhamnopyranosyl-(1 $\rightarrow$ 2)- $\alpha$ -L-arabinose                                                   |
| P5  | 6.30     | C41H66O12 | 749.44815            | 749.45188              | 5           | 603.3887,471.3510          | 2.3                          | Hederagenin sapogenin 3-O- $\alpha$ -L-rhamnopyranosyl-(1 $\rightarrow$ 2)- $\alpha$ -L-arabinose                                                                                                  |
| P6  | 6.76     | C48H78O18 | 941.51154            | 941.5183               | 2.2         | 895.5181,733.4625,455.3553 | 4.4                          | Pulsatilloside C                                                                                                                                                                                   |
| P7  | 7.69     | C47H76O16 | 895.50606            | 895.51398              | 0.8         | 733.4619,587.4006,455.3553 | 2.9                          | Oleanolic acid 3-O- $\beta$ -D-glucopyranosyl-(1 $\rightarrow$ 4)-[ $\alpha$ -L-rhamnanopyranosyl-(1 $\rightarrow$ 2)]- $\alpha$ -L-arabinose                                                      |
| P8  | 7.96     | C53H86O21 | 1057.55888           | 1057.56851             | 3.8         | 733.4614,587.4001,455.3549 | 8.8                          | Oleanolic acid 3-O- $\beta$ -D-glucopyranosyl-(1 $\rightarrow$ 4)- $\beta$ -D-glucopyranosyl-(1 $\rightarrow$ 3)- $\alpha$ -L-rhamnanopyranosyl-(1 $\rightarrow$ 2)- $\alpha$ -L-arabinopyranoside |
| P9  | 11.9     | C41H66O11 | 733.45324            | 733.45954              | 1.2         | 569.3900,455.3558          | 10.0                         | Oleanolic acid 3-O- $\alpha$ -L-rhamnopyranosyl-(1 $\rightarrow$ 2)- $\alpha$ -L-arabinopyranoside                                                                                                 |
| P10 | 12.85    | C30H48O4  | 471.34798            | 471.35029              | 1.3         | 393.3183,333.2231          | 5.6                          | Hederagenin                                                                                                                                                                                        |

## Supplementary Figure S2

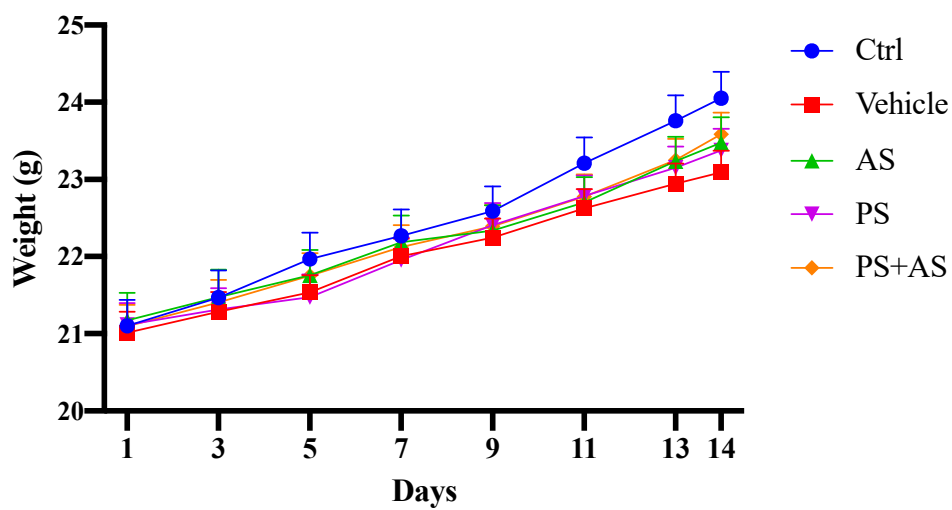

**Supplementary Figure S2.** Pulsatilla saponins (PS) had no effect on body weight in mice with lung metastases. Weight change map of mice.
